# Supplementary material
Source: PubMed Central journal article supplement (PMC5748908)
Supplement: ASN.2017030267SupplementaryData2.pdf [file ASN.2017030267SupplementaryData2.pdf]

## SIGNIFICANCE STATEMENT

Magnesium ( $\text{Mg}^{2+}$ ) is essential for many enzymatic reactions involved in energy metabolism, and abnormal  $\text{Mg}^{2+}$  levels are associated with diabetes and metabolic disorders. The genetic factors regulating  $\text{Mg}^{2+}$  homeostasis are poorly characterized. Using genome-wide association studies (GWAS) in European populations, we discovered two loci significantly associated with urinary  $\text{Mg}^{2+}$ : the *TRPM6* gene coding for a  $\text{Mg}^{2+}$  channel and the *ARL15* gene, which is linked to lipid levels, type 2 diabetes and cardiovascular disease. We find that *ARL15* influences  $\text{Mg}^{2+}$  reabsorption through regulation of *TRPM6*, suggesting a genetic mechanism for the association of urinary  $\text{Mg}^{2+}$  excretion with metabolic phenotypes. These findings suggest that gene-diet interactions may contribute to the link between  $\text{Mg}^{2+}$  homeostasis and metabolic disorders in the general population.
